# Supplementary material for: Protein tyrosine phosphatase PTPN3 promotes drug resistance and stem cell-like characteristics in ovarian cancer
Source: PubMed Central journal article supplement (PMC5105059; doi:10.1038/srep36873), 2016-11-11
Supplement: srep36873-s1.pdf [file srep36873-s1.pdf]

## **Supplementary information**

Protein tyrosine phosphatase PTPN3 promotes drug resistance and stem cell-like characteristics in ovarian cancer

Shuqin Li<sup>1,\*</sup>, Jian Cao<sup>2,\*</sup>, Wei Zhang<sup>3</sup>, Fan Zhang<sup>3</sup>, Guantai Ni<sup>1</sup>, Qian Luo<sup>1</sup>, Man Wang<sup>4</sup>, Xiang Tao<sup>5,#</sup>, Hongping Xia<sup>3,6,#</sup>

## **Supplementary materials and methods**

### **CellTiter 96 AQueous One solution cell proliferation assay**

After treatment, the cell growth and viability to drug treatment was measured using the CellTiter 96 AQueous One solution cell proliferation assay (Promega, USA). This assay is based on the cleavage of tetrazoliumsalts [3-(4,5-dimethyl-2-yl)-5-(3-carboxymethoxyphenyl)-2-(4-sulfophenyl)-2H-tetrazolium, inner salt; MTS] and an electron coupling reagent (phenazineethosulfate; PES). The absorbance was read at 490 nm using a Wallac VICTOR3. multilabel plate reader from PerkinElmer followed by 2 hours incubation with CellTiter 96 AQueous One solution in culture medium. Results were normalized against controls with illumination and presented as percentage of cell viability.

## **Real time quantitative reverse transcription PCR (qRT-PCR) analysis**

The total RNA was isolated using the RNeasy Mini Kit (QIAGEN) and examined using the NanoDrop ND-1000 UV-Vis Spectrophotometer. For mRNA detection, the total RNA was reverse transcribed using the 5X All-In-One RT MasterMix (Applied Biological Materials Inc. Canada). The qPCR was performed using EvaGreen 2X qPCR MasterMix (Applied Biological Materials Inc. Canada). For miRNA detection, the total RNA samples were polyadenylated and reverse transcribed for a two-step quantitative RT-PCR reaction using the miRNA cDNA Synthesis Kit and miRNA qPCR MasterMixes (Applied Biological Materials Inc. Canada) according to the manufacturer's instructions. The *HPRT1* or *U6* gene was used as an endogenous control, and fold changes were calculated via relative quantification ( $2^{-\Delta Ct}$ ).

## **Western blotting**

The cells were plated in the six well plate and were allowed to grow to 90% confluent within 3 days. Cell lysate was prepared in RIPA buffer with the addition of protease inhibitor cocktail, phosphatase inhibitor cocktail and DTT (Dithiothreitol) (Sigma Aldrich, St. Louis, MO, USA). Protein concentration was calculated by the BCA Protein assay kit (Thermo Scientific, UK). NuPAGE Novex 4-12% Bis-Tris protein gels (Novex, Life Technologies) were used for all Western blotting assays. The PTPN3 and GAPDH primary and secondary antibody were bought from Sigma. Bands were detected using super signal west pico chemiluminescent substrate (Thermo Scientific, USA) after incubation with primary antibody and HRP-cojugated secondary antibody (Sigma).

## **Cell cycle analysis**

The A2780CIS and A2780ADR cells were seeded in the six well plates and transfected with esiRNA for 72 h. Cells were collected by trypsinization and washed twice in PBS, fixed in 70% chilled ethanol by adding dropwise into the samples while vortexing and stored at 4 °C until analyzed. Immediately before analysis, cells were washed twice in PBS, and incubated with 250 µg/ml RNase A (Invitrogen) for 30 min at room temperature, followed by staining with PI (Sigma) at 20 µg/ml final concentration for 30 min incubation in dark. The cell cycle distribution and percentage of apoptotic cells were analysed using a FACS analyser (BD LSRFortessa). Ten thousand cells were analysed for each sample. Appropriate gating was used to select the single-cell population. The percentage of cells in sub-2n phase was determined using software (BD FACSDiva v6.0).

## **In vitro transwell cell migration assay**

The transwell cell migration assay was carried out using 24 well Transwell chambers (8 µm pore size, BD Biosciences, CA, USA). In brief, 600 µl complete medium was added to the bottom chamber. The A2780CIS and A2780ADR cells were seeded in the six well plates and transfected with esiRNA for 24 h. The transfected cells were suspended in serum-free medium, and 500 µl of the cell suspension (containing  $5 \times 10^4$  cells) was placed in the upper chamber. After 24 hours, any non-migrated cells on the upper surface of the membrane were removed using a cotton swab, and the cells on the bottom surface of the membrane were fixed in 95% ethanol and stained with a 0.1% crystal violet solution. The stained migrated cells adhering to the

bottom surface of the membrane were photographed and counted in five randomly selected areas under a 40× microscope field. Each experiment was repeated three times.

### **Soft agar colony formation assay**

The A2780CIS and A2780ADR cells were seeded in the six well plates and transfected with validated shRNA shPTPN3 or shScramble (Sigma). The stable transfected cell clones were selected using puromycin (2ug/ml). The validated shRNA stable transfected A2780CIS and A2780ADR cells were seeded in six well plates in growth medium containing 0.7% soft agar (1ml per well) on top of a layer of growth medium containing 1.4% agar (1ml per well). Growth medium (1ml) with 10% FBS was added on top of the agar. The cell suspension was plated and cultured in a 37 °C incubator for around 3 weeks. After that, the colonies were fixed with methanol and stained with 0.05% crystal violet in 25% methanol. The colonies were pictured and counted under an inverted microscope.

### **Flow cytometric analysis of ALDH+ and CD133+ cell population**

The validated shRNA stable transfected A2780CIS and A2780ADR cell suspensions were counted and incubated with primary antibodies CD133 (Miltenyi Biotec). ALDH+ enzymatic activity was defined using the ALDEFLUOR kit per protocol (Stem Cell Technologies, Vancouver, BC, Canada). For each sample ½ of cell/substrate mixture was treated with 50 mmol/L diethylaminobenzaldehyde (DEAB). Cells were incubated for 45 min. Gating was established using Propidium Iodide (PI)-exclusion for viability and ALDEFLUOR/DEAB

treated cells were used to define negative gates. FACS was performed with  $\geq 1 \times 10^5$  cells using the BD FACSCanto II (Becton Dickinson, San Diego, USA)<sup>1</sup>.

### **Sphere formation**

Sphere culture was performed as previously described<sup>2</sup>. Briefly, the validated shRNA stable transfected A2780CIS and A2780ADR cells were plated in triplicate in ultra-low attachment plates in serum-free DMEM/F12 medium supplemented with 5  $\mu\text{g}/\text{mL}$  insulin (Sigma), 20 ng/mL human recombinant epidermal growth factor (EGF, Peprotech), 10 ng/mL basic fibroblastic growth factor (bFGF, Peprotech) and B27 Supplement (Gibco). Cells were plated at the indicated density and from 1,000–10,000 cells/ml in subsequent passage. Sphere formation was assessed 2 weeks after seeding the cells.

### **Luciferase reporter assay**

The 3'-UTR sequence of PTPN3 predicted to interact with miR-199 or a mutated 3'-UTR sequence within the predicted target sites was synthesized and inserted into the XbaI and FseI sites of the pGL3 control vector (Promega, Madison, WI). These constructs were named as pGL3-PTPN3-3'UTR or pGL3-PTPN3-3'UTR-mut, respectively. For the reporter assay, HEK293 cells were plated onto 24-well plates and transfected with the above constructs and miR-199 mimics or mimics control using Lipofectamine 3000 (Thermo Fisher Scientific, USA). A Renilla luciferase vector pRL-SV50 (Promega, Madison, WI) was co-transfected to normalize the difference in the transfection efficiency. After 48h, the cells were harvested and assayed using the dual-luciferase reporter assay system (Promega, Madison, WI) according to the

manufacturer's instructions. Results were obtained from three independent experiments performed in duplicate.

### **Survival and statistical analysis**

The experimental data are presented as the mean  $\pm$  standard deviation (SD). All statistical analyses were performed using ANOVA or a two-tailed Student's *t* test by GraphPad Prism 5.0 (GraphPad Software, La Jolla, CA). The survival curves were created using the Kaplan-Meier method and statistically compared using a log-rank test. Differences were considered statistically significant when the P-values were less than 0.05.

### **References:**

- 1 Silva, I. A. *et al.* Aldehyde dehydrogenase in combination with CD133 defines angiogenic ovarian cancer stem cells that portend poor patient survival. *Cancer research* **71**, 3991-4001 (2011).
- 2 Xia, H. *et al.* Loss of brain-enriched miR-124 microRNA enhances stem-like traits and invasiveness of glioma cells. *J Biol Chem.* **287**, 9962-9971 (2012).

## Supplementary Tables

Table S1 The significantly dysregulated genes of A2780CIS and A2780ADR compared with A2780 in the GSE53418

| <b>Probeset ID</b> | <b>Gene Symbol</b> | <b>A2780_ADR vs.<br/>A2780</b> | <b>A2780_CIS vs.<br/>A2780</b> |
|--------------------|--------------------|--------------------------------|--------------------------------|
| 3219944            | PTPN3              | 100.481                        | 101.965                        |
| 2965223            | EPHA7              | -106.497                       | -100.621                       |
| 3344161            | NAALAD2            | -115.539                       | -103.283                       |
| 3986112            | NRK                | -113.747                       | -108.412                       |
| 2965237            | EPHA7              | -107.005                       | -108.622                       |
| 3510132            | TRPC4              | -171.893                       | -109.148                       |
| 2366851            | PRRX1              | -132.973                       | -115.105                       |
| 2965214            | EPHA7              | -129.582                       | -115.157                       |
| 3510131            | TRPC4              | -121.894                       | -115.816                       |
| 3324451            | FIBIN              | -136.241                       | -116.184                       |
| 3652015            | OTOA               | -111.461                       | -116.226                       |
| 3366944            | SLC5A12            | -112.916                       | -116.37                        |
| 3986115            | NRK                | -209.599                       | -117.304                       |
| 3324365            |                    | -113.59                        | -117.724                       |
| 3510139            | TRPC4              | -145.005                       | -121.646                       |
| 3777322            | ARHGAP28           | -148.227                       | -126.402                       |
| 3986123            | NRK                | -126.314                       | -129.584                       |
| 3777312            | ARHGAP28           | -134.569                       | -131.624                       |
| 2342505            | LHX8               | -114.281                       | -139.226                       |
| 3986143            | NRK                | -202.703                       | -139.253                       |
| 3986026            | IL1RAPL2           | -149.324                       | -139.482                       |
| 3510167            | TRPC4              | -105.298                       | -140.921                       |
| 3486124            | FREM2              | -120.302                       | -145.653                       |
| 3344158            | NAALAD2            | -239.081                       | -145.898                       |
| 2342510            | LHX8               | -134.037                       | -147.594                       |
| 2965210            | EPHA7              | -284.958                       | -150.006                       |
| 3986136            | NRK                | -106.805                       | -150.631                       |
| 3344160            | NAALAD2            | -162.891                       | -152.248                       |
| 3986111            | NRK                | -303.754                       | -152.345                       |
| 3986122            | NRK                | -116.957                       | -155.158                       |
| 3652036            | OTOA               | -153.474                       | -158.502                       |
| 3986109            | NRK                | -123.26                        | -159.051                       |
| 3324346            | ANO3               | -257.755                       | -160.76                        |

|         |          |          |          |
|---------|----------|----------|----------|
| 3510168 | TRPC4    | -157.404 | -171.234 |
| 3344156 | NAALAD2  | -122.034 | -171.54  |
| 3103712 | PII5     | -190.764 | -175.245 |
| 3324344 | ANO3     | -113.016 | -180.912 |
| 3344155 | NAALAD2  | -289.291 | -193.526 |
| 3344179 | NAALAD2  | -167.326 | -203.439 |
| 3777317 | ARHGAP28 | -160.854 | -225.81  |
| 3986117 | NRK      | -204.776 | -227.574 |
| 3324387 | ANO3     | -265.113 | -235.006 |
| 3324390 | ANO3     | -220.355 | -237.983 |
| 2342509 | LHX8     | -186.281 | -246.597 |
| 3777311 | ARHGAP28 | -174.349 | -253.825 |
| 2372798 | RGS1     | -101.795 | -269.696 |
| 3103714 | PII5     | -108.553 | -281.903 |
| 3986108 | NRK      | -188.003 | -292.674 |
| 3424902 | NTS      | -141.583 | -313.984 |
| 3777313 | ARHGAP28 | -149.726 | -319.436 |
| 2965209 | EPHA7    | -141.259 | -323.718 |
| 3986121 | NRK      | -121.908 | -326.175 |
| 3103706 | PII5     | -192.921 | -338.613 |
| 3324362 | ANO3     | -316.979 | -343.539 |
| 3024060 | MEST     | -209.537 | -357.971 |
| 3103717 | PII5     | -126.006 | -372.912 |
| 3986116 | NRK      | -386.658 | -406.543 |
| 3324450 | FIBIN    | -513.827 | -418.102 |
| 3986141 | NRK      | -253.374 | -458.852 |
| 3103713 | PII5     | -169.743 | -479.241 |
| 2372794 | RGS1     | -659.785 | -537.644 |

---



Table S2 PTPN3 Expression and Clinic Pathological Characteristics

| Variable      | PTPN3 |      | P value |
|---------------|-------|------|---------|
|               | Low   | High |         |
| Age           |       |      |         |
| ≤58           | 5     | 3    | 0.282   |
| >58           | 7     | 5    |         |
| FIGO stage    |       |      |         |
| Early (I/II)  | 8     | 2    | 0.026   |
| Late (III/IV) | 4     | 6    |         |
| Histology     |       |      |         |
| Serous        | 7     | 5    | 0.162   |
| Mucinous      | 5     | 3    |         |
| Grade         |       |      |         |
| I/II          | 7     | 3    | 0.038   |
| III/IV        | 5     | 5    |         |

Note: FIGO: The International Federation of Gynecology and Obstetrics. Analysis with  $X^2$  test.

Table S3 Predicted microRNA targeting PTPN3-TargetScan and miRDB

| miRNA            | Position in the UTR | Seed match | Target Score in miRDB |
|------------------|---------------------|------------|-----------------------|
| hsa-miR-106a-5p  | 128-135             | 8mer       | 97                    |
| hsa-miR-106b-5p  | 128-135             | 8mer       | 97                    |
| hsa-miR-129-1-3p | 416-422             | 7mer-m8    | 52                    |
| hsa-miR-129-2-3p | 416-422             | 7mer-m8    | 52                    |
| hsa-miR-135a-5p  | 1429-1435           | 7mer-m8    | 69                    |
| hsa-miR-135b-5p  | 1429-1435           | 7mer-m8    | 69                    |
| hsa-miR-153-3p   | 3849-3856           | 8mer       | 85                    |
| hsa-miR-15a-5p   | 832-839             | 8mer       | 98                    |
| hsa-miR-15b-5p   | 832-839             | 8mer       | 98                    |
| hsa-miR-16-5p    | 832-839             | 8mer       | 98                    |
| hsa-miR-17-5p    | 128-135             | 8mer       | 97                    |

|                        |                  |                |           |
|------------------------|------------------|----------------|-----------|
| hsa-miR-195-5p         | 832-839          | 8mer           | 98        |
| <b>hsa-miR-199a-3p</b> | <b>3810-3816</b> | <b>7mer-1A</b> | <b>82</b> |
| <b>hsa-miR-199b-3p</b> | <b>3810-3816</b> | <b>7mer-1A</b> | <b>82</b> |
| hsa-miR-20a-5p         | 128-135          | 8mer           | 97        |
| hsa-miR-20b-5p         | 128-135          | 8mer           | 99        |
| hsa-miR-3129-5p        | 3810-3816        | 7mer-1A        | 82        |
| hsa-miR-424-5p         | 832-839          | 8mer           | 100       |
| hsa-miR-497-5p         | 832-839          | 8mer           | 98        |
| hsa-miR-519d-3p        | 128-135          | 8mer           | 97        |
| hsa-miR-526b-3p        | 128-135          | 8mer           | 97        |
| hsa-miR-543            | 3774-3780        | 7mer-m8        | 83        |
| hsa-miR-6838-5p        | 832-839          | 8mer           | 98        |
| hsa-miR-93-5p          | 128-135          | 8mer           | 97        |

---
